# Supplementary material for: Functional repair of p53 mutation in colorectal cancer cells using trans-splicing
Source: PubMed Central journal article supplement (PMC4385834; doi:10.18632/oncotarget.2988), 2014-12-10
Supplement: oncotarget-06-2034-s001.pdf [file oncotarget-06-2034-s001.pdf]

## Functional repair of p53 mutation in colorectal cancer cells using trans-splicing

### Supplementary Material

#### Functional repair of p53 mutation in colorectal cancer cells using trans-splicing

Xingxing He, Jiazhi Liao, Fang Liu, Junwei Yan, Jingjun Yan, Haitao Shang, Qian Dou, Ying Chang, Jusheng Lin, and Yuhu Song

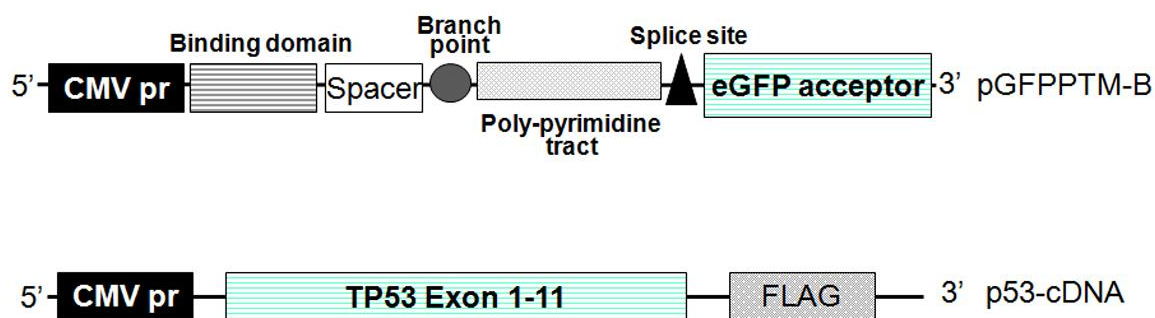

**Figure S1:** Schematic representation of the plasmids encoding eGFP pre-trans-splicing molecules (PTM) and p53 cDNA. The plasmid (pGFPPTM-B) contained CMV promoter, a binding domain, spacer, branch point, poly-pyrimidine tract, splice acceptor site, eGFP acceptor (GenBank accession # U55763.1 nt 995-1410) and Flag-tag. The binding domain is antisense to intron 7 of p53 pre-mRNA. The plasmid of p53 cDNA contained CMV promoter, p53 cDNA (GenBank accession # NM\_000546 nt 198-1379) and Flag-tag, which was used as positive control.

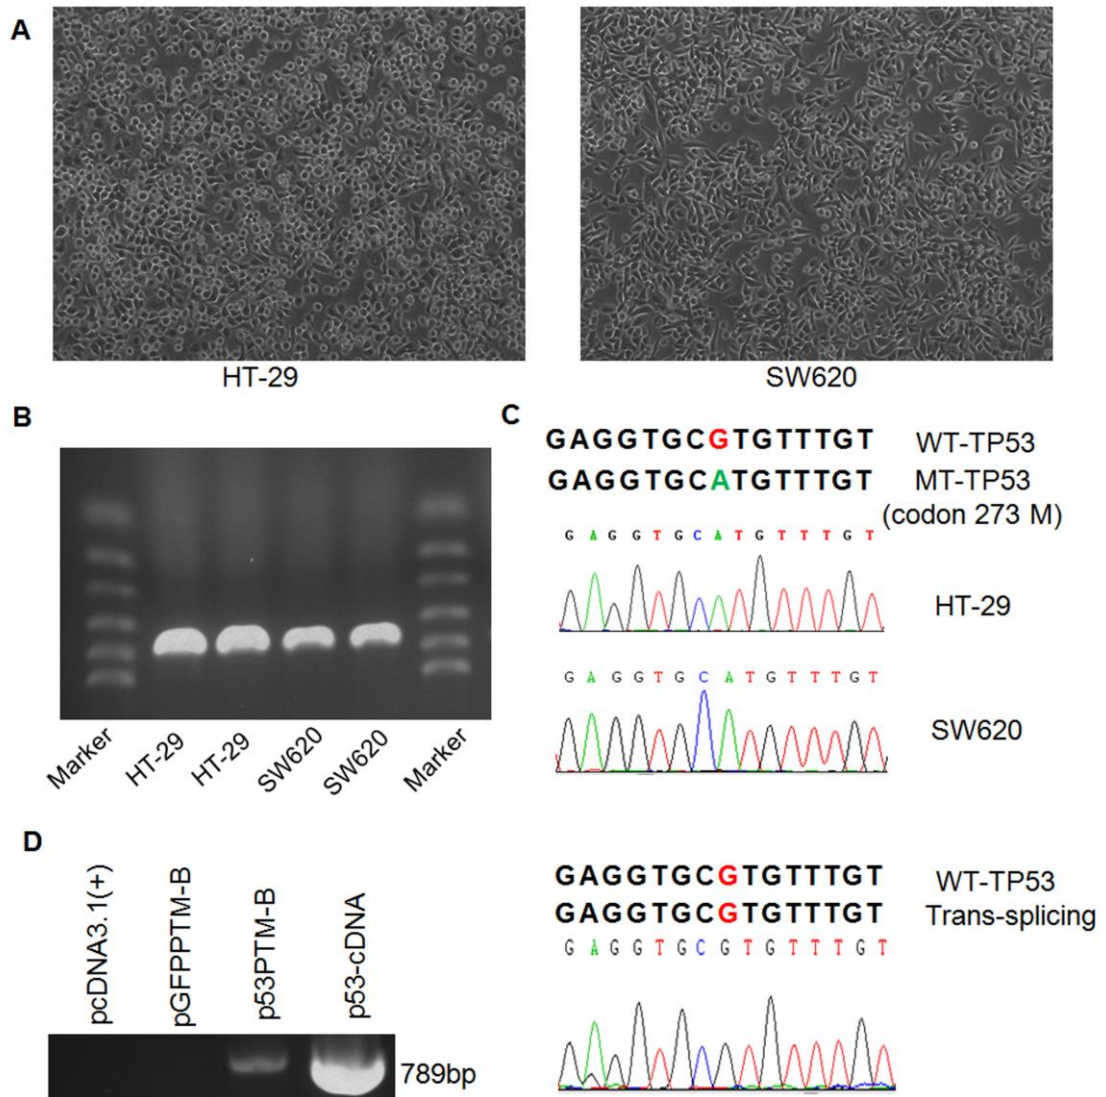

**Figure S2:** The detection of trans-splicing-mediated repair of mutant p53 transcripts in transfected SW620 cells.

- The micrographs of colorectal cancer cell lines HT-29 and SW620.
- RT-PCR (Reverse transcription-polymerase chain reaction) was performed to amplified part of TP53 cDNA on total RNA isolated from colorectal cancer cell lines HT-29 and SW620. The primers used for RT-PCR (TP53-FP and TP53-RP ) were listed in Supplementary Table1.
- DNA sequence results of the RT-PCR products amplified from HT-29 and SW620 cells. The results confirm there is a G to A mutation in codon 273 of the p53 gene resulting in an Arg to His substitution in HT-29 and SW620 cells.

D. Detection of trans-spliced p53 RNA in SW620 cells transfected with p53-PTM-B. The result of RT-PCR showed the generation of trans-spliced p53 RNA in SW620 cells transfected with p53-PTM-B. DNA sequence analysis of trans-spliced p53 RNA confirmed that the mutation in codon 273 of the p53 gene was repaired by trans-splicing.

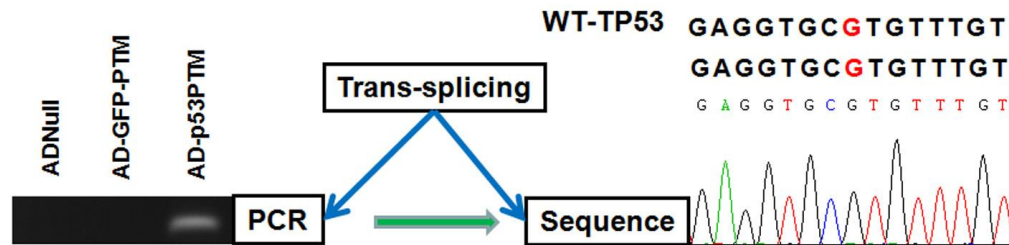

**Figure S3:** The detection of trans-splicing-mediated repair of mutant p53 transcripts in HT-29 cells infected with adenovirus vector expressing p53-PTM. RT-PCR analysis evaluated trans-spliced p53 transcripts in HT-29 cells infected with Ad-p53-PTM. HT-29 cells were infected with recombinant adenovirus expressing p53-PTM or the controls; 48 hours after infection, RNA isolated from infected cell was subjected to RT-PCR analysis for trans-spliced p53 transcripts. The result demonstrated that trans-spliced p53 mRNA was only detected in HT-29 cells infected with Ad-p53-PTM (left panel). DNA sequence analysis of the RT-PCR product demonstrated mutant site of p53 in codon 273 was repaired (right panel).

**Table S1: Primers used for plasmids construct, the detection of trans-splicing and the amplification of p53 cDNA.**

| Primer names        | Purpose                                                               | Sequences (5' to 3')                                             |
|---------------------|-----------------------------------------------------------------------|------------------------------------------------------------------|
| <b>TP53-FP</b>      | Amplification of p53 part cDNA used for the detection of p53 mutation | CCCCACCATGAGCGCTGCTC                                             |
| <b>TP53-RP</b>      | Amplification of p53 part cDNA used for the detection of p53 mutation | CGCTCACGCCACGGATCTG                                              |
| <b>TP53-S-P</b>     | Sequencing primer used for the detection of p53 mutation              | ATGAGCCGCCTGAGGTTGG                                              |
| <b>BD-A-FP</b>      | Amplification of binding domain A                                     | CGC <b>GGATCC</b> AACCACCCTTGTCTTTCTG                            |
| <b>BD-A-RP</b>      | Amplification of binding domain A                                     | CCG <b>GAATTC</b> ACCCATCCACCTCTCATCACATCC                       |
| <b>BD-B-FP</b>      | Amplification of binding domain B                                     | CGC <b>GGATCC</b> AGGAAAAGAGAAGCAAGAGGCAGT                       |
| <b>BD-B-RP</b>      | Amplification of binding domain B                                     | CCG <b>GAATTC</b> TGTGGCTTCTCCTCCACCTACCT                        |
| <b>p53-E8-11-FP</b> | Amplification of exon 8-11 of p53                                     | ATAAGAAT <b>GCGGCCGC</b> TCTTCTTTTTTTTGCAGTGGTAATCTACTGGG        |
| <b>p53-E8-11-RP</b> | Amplification of exon 8-11 of p53                                     | CCG <b>CTCGAGCTACTTGTCATCGTCGTCCTTGTAAGTCGTC</b> CTGAGTCAGGCCCTT |
| <b>p53-cDNA-FP</b>  | Amplification of p53 cDNA                                             | CGC <b>GGATCC</b> GCCACCATGGAGGAGCCGCAG                          |
| <b>p53-cDNA-RP</b>  | Amplification of p53 cDNA                                             | CCG <b>CTCGAGCTACTTGTCATCGTCGTCCTTGTAAGTCGTC</b> CTGAGTCAGGCCCTT |
| <b>PF</b>           | Detection of trans-spliced p53 RNA                                    | CAAGACCTGCCCTGTGCAGC                                             |
| <b>PR</b>           | Detection of trans-spliced p53 RNA                                    | ACTTGTCATCGTCGTCCTTG                                             |

FP, forward primer; RP, reverse primer. BamHI:**GGATCC**; EcoRI:**GAATTC**; NotI:**GCGGCCGC**; XhoI:**CTCGAG**;

FLAG: **CTT GTC ATC GTC GTC CTT GTA GTC**.

**Table S2: Primers used in SYBR Green qRT-PCR.**

| Primer names        | Sequences (5' to 3')      |
|---------------------|---------------------------|
| <b>Cyclin A2-FP</b> | CAGACGGCGCTCCAAGAGGA      |
| <b>Cyclin A2-RP</b> | AGGGGTGCAACCCGTCTCG       |
| <b>Cyclin B1-FP</b> | TCCGAGTCACCAGGAACTCGAAAA  |
| <b>Cyclin B1-RP</b> | AGTCCGGGCTTGGAGGTTGC      |
| <b>Cyclin D1-FP</b> | GCGTACCCCGATGCCAACCT      |
| <b>Cyclin D1-RP</b> | CCTCGCAGACCTCCAGCATCC     |
| <b>Cyclin E1-FP</b> | CAGGGGCGTCGCTGATGAAGA     |
| <b>Cyclin E1-RP</b> | TGCTCGGGCTTTGTCCAGCAA     |
| <b>Bcl-2-FP</b>     | CGGAGGCTGGGATGCCTTTGT     |
| <b>Bcl-2-RP</b>     | AGCTCCCACCAGGGCCAAAC      |
| <b>p21-FP</b>       | CACTCAGAGGAGGCGCCATGT     |
| <b>p21-RP</b>       | GCCCGCCATTAGCGCATCAC      |
| <b>Bax-FP</b>       | GCAAACCTGGTGCTCAAGGCC     |
| <b>Bax-RP</b>       | TCTCACCCAACCACCCTGGTCT    |
| <b>PUMA-FP</b>      | TGGGACTCCTGCCCTTAC        |
| <b>PUMA-RP</b>      | GGCTGGGAGTCCAGTATG        |
| <b>MDM2-FP</b>      | GCGCCCCGTGAAGGAAACTG      |
| <b>MDM2-RP</b>      | TGCACATTTGCCTGCTCCTCAC    |
| <b>Caspase-3-FP</b> | GGCGGTTGTAGAAGAGTTTCGTGA  |
| <b>Caspase-3-RP</b> | ACCGAAAACCAGAGCGCCGA      |
| <b>PARP1-FP</b>     | GATTGCTGTGGCACGGGTCC      |
| <b>PARP1-RP</b>     | TAGCCTGTACGGGCGCTTC       |
| <b>GAPDH-FP</b>     | CCCAGCAAGAGCACAAGAG       |
| <b>GAPDH-RP</b>     | GCACAGGGTACTTTATTGATGGTAC |

FP, forward primer; RP, reverse primer
